# Supplementary material
Source: publisher figshare collection journal article supplement (https://tandf.figshare.com/ndownloader/files/12452342)
Supplement: Supplementary file 1 [file 12452342]

Supplemental Material

**Human-biomonitoring and Individual Soil Measurements for Children and Mothers in an area with recently detected mercury-contaminations and public health concerns: A Cross-sectional Study**

David Imo, Stefanie Muff, Rudolf Schierl, Katarzyna Byber, Christine Hitzke, Matthias Bopp, Marion Maggi, Stephan Bose-O'Reilly, Leonhard Held, Holger Dressel

Table of content:

**Table S1**. Percentiles and geometric means of mercury in urine (µg/L)

Table S1. Percentiles and geometric means of mercury in urine (µg/L)

|  | **Adults** | | | | | | | | | | | |
| --- | --- | --- | --- | --- | --- | --- | --- | --- | --- | --- | --- | --- |
| **Study** | **Country** | **Period** | **Population (n)** | **Age (y)** | **P5** | **P10** | **P25** | **P50** | **P75** | **P90** | **P95** | **GM** |
|  |  |  |  |  |  | | | | | | | |
| **Current Data** | Switzerland | 2015 | Women (64) | 25-55 | 0.04 | 0.07 | 0.13 | 0.25 | 0.48 | 0.76 | 1.39 | 0.25 |
| **GerESII (Schulz et al. 2007)** | Germany | 1990-1992 | Adults (4002) | 18-79 | NA | NA | NA | 0.50 | NA | NA | 3.70 | 0.53 |
| **GerESIII (Schulz et al. 2007)** | Germany | 1997-1999 | Adults (4052) | 18-69 | NA | NA | NA | 0.40 | NA | NA | 3.00 | 0.40 |
| **Health Canada (HealthCanada 2010)** | Canada | 2007-2009 | Women (654) | 20-39 | NA | <0.1 | <0.1 | 0.24 | 0.71 | 1.62 | 2.62 | NA |
| **CDC/NHANES (CDC 2015)** | USA | 2011-2012 | Adults (1716) | ≥20 | NA | NA | NA | 0.34 | 0.72 | 1.49 | 1.93 | 0.35 |
|  |  |  |  |  |  |  |  |  |  |  |  |  |
|  | **Children** | | | | | | | | | | | |
| **Study** | **Country** | **Period** | **Population (n)** | **Age (y)** | **P5** | **P10** | **P25** | **P50** | **P75** | **P90** | **P95** | **GM** |
|  |  |  |  |  |  |  |  |  |  |  |  |  |
| **Current Data** | Switzerland | 2015 | Children (104) | 3-12 | 0.04 | 0.05 | 0.08 | 0.17 | 0.25 | 0.39 | 0.50 | 0.15 |
| **GerESII (Schulz et al. 2007)** | Germany | 1990-1992 | Children (732) | 6-17 | NA | NA | NA | 0.5 | NA | NA | 3.9 | 0.54 |
| **GerESIV (Umweltbundesamt 2008)** | Germany | 2003-2006 | Children (1734) | 3-14 | <0.1 | <0.1 | <0.1 | <0.1 | NA | 0.30 | 0.52 | <0.1 |
| **Health Canada (HealthCanada 2010)** | Canada | 2007-2009 | Children (1028) | 6-11 | NA | <0.1 | <0.1 | <0.1 | 0.35 | 1.02 | 1.92 | NA |
| **CDC/NHANES (CDC 2015)** | USA | 2011-2012 | Children (401) | 6-11 | NA | NA | NA | 0.22 | 0.45 | 0.93 | 1.37 | 0.24 |
|  |  |  |  |  |  |  |  |  |  |  |  |  |

*Abbreviations*: P: Percentile; GM: geometric mean; NA: not available.

CDC. 2015. Fourth Report on Human Exposure to Environmental Chemicals, Updated Tables, (February, 2015). Atlanta, GA: U.S. Department of Health and Human Services, Centers for Disease Control and Prevention. <http://www.cdc.gov/exposurereport/>.

HealthCanada. 2010. Report on Human Biomonitoring of Environmental Chemicals in Canada - Results of the Canadian Health Measures Survey Cycle 1 (2007–2009), Health Canada

Schulz C, Conrad A, Becker K, Kolossa-Gehring M, Seiwert M, Seifert B. 2007. Twenty years of the German Environmental Survey (GerES): human biomonitoring--temporal and spatial (West Germany/East Germany) differences in population exposure. Int J Hyg Environ Health. 210(3-4):271-297. eng.

Umweltbundesamt. 2008. German Environmental Survey for Children 2003/06 - GerES IV – Human Biomonitoring Levels of selected substances in blood and urine of children in Germany. Umweltbundesamt.
